# Supplementary material for: Growth of large Cs2Cu(Cl, Br)4 single crystals
Source: Royal Society of Chemistry journal article supplement (doi:10.1039/d3ce00934c), 2023-01-01
Supplement: d3ce00934c1.pdf [file d3ce00934c1.pdf]

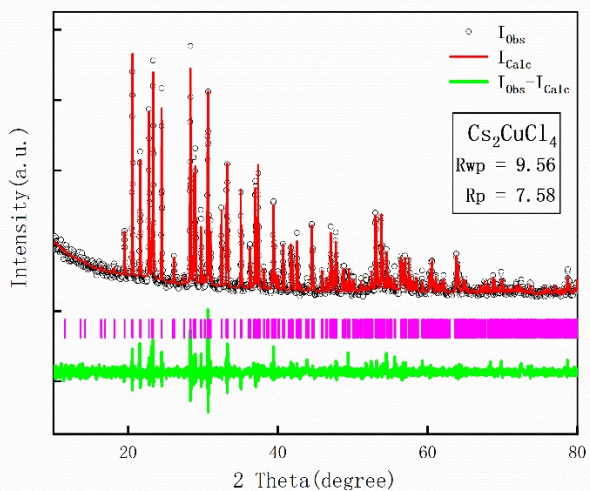

**Fig. S1** PXRD pattern of  $\text{Cs}_2\text{CuCl}_4$  crystal and the data obtained by Rietveld fitting program.

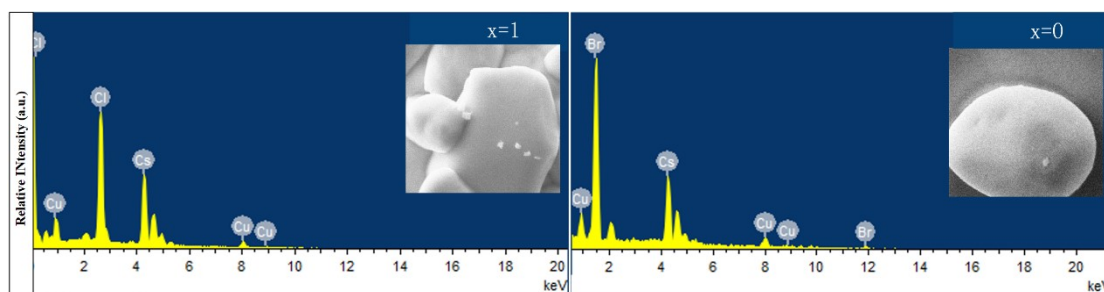

**Fig. S2** SEM and EDS of the  $\text{Cs}_2\text{CuCl}_4$  and  $\text{Cs}_2\text{CuBr}_4$  single crystals.

Table S1 Comparison of the absorption performance in this work with previous reports.

| $\text{Cs}_2\text{Cu}(\text{Cl}_x\text{Br}_{1-x})_4$ | absorption band (this work) | absorption band (reported work) |
|------------------------------------------------------|-----------------------------|---------------------------------|
| x=0                                                  | 321                         | 335 <sup>[15]</sup>             |
| x=0.25                                               | 303                         | /                               |
| x=0.5                                                | 293                         | 290 <sup>[16]</sup>             |
| x=0.75                                               | 281                         | /                               |
| x=1                                                  | 388                         | 374 <sup>[22]</sup>             |
